# Supplementary material for: The Berkeley Environmental Air-quality and CO 2 Network: field calibrations of sensor temperature dependence and assessment of network scale CO 2 accuracy
Source: Copernicus journal article supplement (doi:10.5194/amt-2021-120), 2021-05-11
Supplement: Supplementary file 2 [file amt-2021-120-supplement.zip]

Archive with 2 entries (2 files):
- temp_slope_bay_2020.xlsx
- Vaisala_temp_dependence (1)_Part2.pdf
