# Supplementary material for: The Berkeley Environmental Air-quality and CO 2 Network: field calibrations of sensor temperature dependence and assessment of network scale CO 2 accuracy
Source: Copernicus journal article supplement (doi:10.5194/amt-2021-120), 2021-05-11
Supplement: Supplementary file 2 [file amt-2021-120-supplement.zip › temp_slope_bay_2020.xlsx]

## Sheet: Sheet1
site name	siteid	slope_picarro	slope_median	slope_med <1	delta slope
Fred T Korematsu	31	-0.42	-0.2	-0.31	-0.22
Elsa	62	-0.22	-0.09	-0.16	-0.13
Kaiser Building	54	0.27	0.47	0.35	-0.2
Collins	28	0.27	0.5	0.39	-0.23
Sheldon	30	0.46	0.67	0.61	-0.21
Mira Vista	23	-0.13	0.13	-0.003	-0.26
John W. Finney	61	-2.15	-1.93	-2.04	-0.22
Peres	26	-0.78	-0.55	-0.68	-0.23
Washington	21	0.1	0.27	0.16	-0.17
RFS	41	2.04	2.32	2.15	-0.28
Nystrom	20	-0.73	-0.57	-0.65	-0.16
Montalvin	29	-0.55	-0.36	-0.43	-0.19
College Prep	37	0.44	0.72	0.57	-0.28
Oakland High	33	0.61	0.78	0.7	-0.17
St. Elizabeth	38	0.11	0.32	0.21	-0.21
Dejean	22	-0.55	-0.4	-0.48	-0.15
Richmond High	13	-0.4	-0.22	-0.32	-0.18
Helms	14	0.21	0.43	0.33	-0.22
EBMUD	42	3.1	3.33	3.19	-0.23
Laney College	45	1.22	1.44	1.31	-0.22
Montclair	4	-1.97	-1.77	-1.86	-0.2
Park Day	32	-1.36	-1.44	-1.45	0.08
Federal Terrace	64	-0.89	-0.67	-0.78	-0.22
Cooper	58	-0.44	-0.25	-0.35	-0.19
Ohlone	15	-0.43	-0.17	-0.26	-0.26
Glen Cove	82	-0.59	-0.42	-0.49	-0.17
Highland	59	-0.74	-0.57	-0.66	-0.17
Mare Island	65	-0.19	0.04	-0.04	-0.23
Beverly Hills	81	-0.65	-0.46	-0.55	-0.19
Dan Mini	63	-0.31	-0.13	-0.21	-0.18
Grace Patterson	80	0.14	0.33	0.23	-0.19
Fred T Korematsu Portola	25	0.14	0.35	0.22	-0.21
Madera	24	0.67	0.85	0.75	-0.18
Exploratorium Embarcadero	47	-0.47	-0.22	-0.37	-0.25
Exploratorium Bay	48	-0.03	0.24	0.07	-0.27
BAAQMD San Pablo	43	0.95	1.19	1.07	-0.24
					-0.200833
